# Supplementary material for: Modelling for the Inheritance of Endangered Equid Multiple Births and Fertility: Determining Risk Factors and Genetic Parameters in Donkeys <em>(Equus asinus)</em>
Source: Preprints.org preprint supplement (doi:10.20944/preprints201811.0084.v1), 2018-11-05
Supplement: Supplementary file 1 [file supplementary]

**Modelling for the inheritance of endangered equid multiple births and fertility: determining risk factors and genetic parameters in donkeys *(Equus asinus)***

Navas, F.J.1,6*; Jordana, J.2,6; León, J.M.3,6; Barba, C.4; McLean, A.K.5,6; Arando, A.1,6 and Delgado, J.V.1,6

| Animals |
| --- |
| *Department of Genetics, Faculty of Veterinary Sciences, University of Córdoba, Córdoba.* |
| [fjng87@hotmail.com](mailto:fjng87@hotmail.com) |

**Supplementary Table S5.**Summary of the results of the Independent-Samples Mann-Whitney U Test and Dunn's test and Bonferroni's significance correction for the effects for whose levels there were statistically significant differences on the historical foal number born per animal, maximum foal number per birth and multiple birth number per animal.

**SEX**

|  | Historical foal number born per donkey | Maximum foal number per birth | Multiple birth number per animal for a given donkey |
| --- | --- | --- | --- |
| **Mann-Whitney U** | 46363.500 | 50364.000 | 47730.000 |
| Wilcoxon W | 217183.500 | 221184.000 | 218550.000 |
| Test Statistic | 46363.500 | 50364.000 | 47730.000 |
| Standard Error | 1846.459 | 1263.771 | 2241.832 |
| Standardized Test Statistic | -3.514 | -1.969 | -2.285 |
| **Asymptotic Sig.(2-sided test)** | 0.000 | 0.049 | 0.022 |


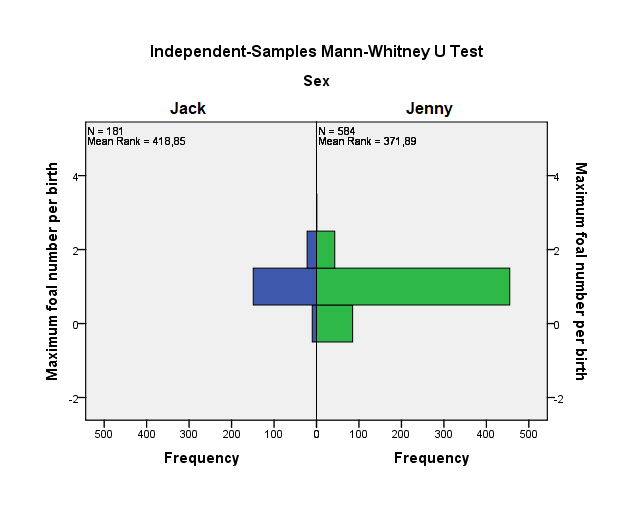


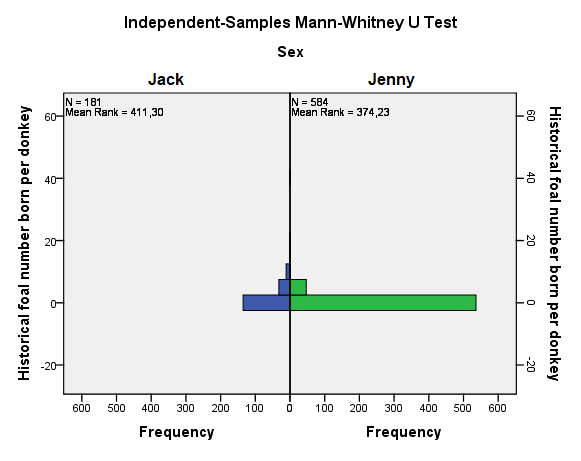

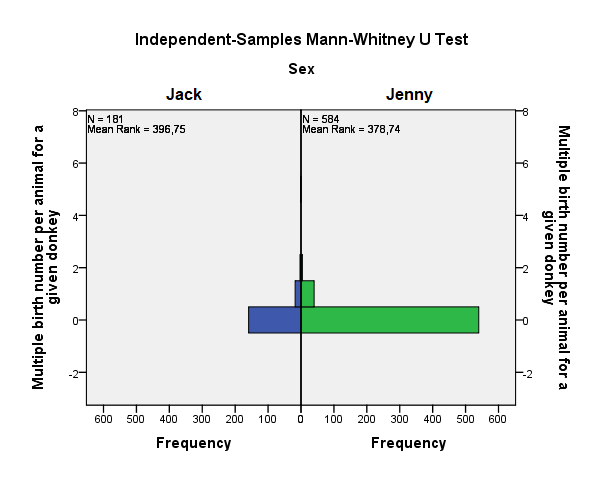


**FARM/OWNER**

| Variable | Farm/owner pairwise comparison | Contrast Statistic | SE | Contrast statistic deviation | Sig. | Bonferroni's Adjusted Sig. |
| --- | --- | --- | --- | --- | --- | --- |
| Maximum foal number per birth | 62-27 | 372.974 | 73.265 | 5.091 | 0.000 | 0.001 |
| Maximum foal number per birth | 30-33 | -368.800 | 88.395 | -4.172 | 0.000 | 0.121 |
| Maximum foal number per birth | 30-32 | -516.750 | 136.036 | -3.799 | 0.000 | 0.583 |
| Maximum foal number per birth | 30-27 | 372.974 | 81.250 | 4.590 | 0.000 | 0.018 |
| Maximum foal number per birth | 30-15 | 332.025 | 86.037 | 3.859 | 0.000 | 0.456 |
| Maximum foal number per birth | 30-7 | 349.500 | 84.591 | 4.132 | 0.000 | 0.144 |
| Maximum foal number per birth | 30-1 | 349.031 | 83.305 | 4.190 | 0.000 | 0.112 |
| Maximum foal number per birth | 62-23 | 285.955 | 73.373 | 3.897 | 0.000 | 0.390 |
| Maximum foal number per birth | 62-19 | 316.364 | 84.723 | 3.734 | 0.000 | 0.755 |
| Maximum foal number per birth | 62-15 | 332.025 | 78.541 | 4.227 | 0.000 | 0.095 |
| Maximum foal number per birth | 62-7 | 349.500 | 76.954 | 4.542 | 0.000 | 0.022 |
| Maximum foal number per birth | 62-1 | 349.031 | 75.538 | 4.621 | 0.000 | 0.015 |
| Maximum foal number per birth | 2-9 | -684.000 | 169.667 | -4.031 | 0.000 | 0.222 |
| Maximum foal number per birth | 2-20 | -684.000 | 162.233 | -4.216 | 0.000 | 0.100 |
| Maximum foal number per birth | 30-20 | 684.000 | 88.395 | 7.738 | 0.000 | 0.000 |
| Maximum foal number per birth | 62-77 | -684.000 | 172.074 | -3.975 | 0.000 | 0.282 |
| Maximum foal number per birth | 30-8 | 379.909 | 91.716 | 4.142 | 0.000 | 0.138 |
| Maximum foal number per birth | 62-75 | -461.000 | 114.716 | -4.019 | 0.000 | 0.234 |
| Maximum foal number per birth | 30-3 | 366.316 | 86.414 | 4.239 | 0.000 | 0.090 |
| Maximum foal number per birth | 62-73 | -461.000 | 114.716 | -4.019 | 0.000 | 0.234 |
| Maximum foal number per birth | 62-67 | -349.500 | 87.616 | -3.989 | 0.000 | 0.266 |
| Maximum foal number per birth | 62-66 | -416.400 | 99.347 | -4.191 | 0.000 | 0.111 |
| Maximum foal number per birth | 62-64 | -684.000 | 131.424 | -5.205 | 0.000 | 0.001 |
| Maximum foal number per birth | 62-20 | 684.000 | 81.116 | 8.432 | 0.000 | 0.000 |
| Maximum foal number per birth | 62-58 | 416.400 | 99.347 | 4.191 | 0.000 | 0.111 |
| Maximum foal number per birth | 62-8 | 379.909 | 84.723 | 4.484 | 0.000 | 0.029 |
| Maximum foal number per birth | 62-3 | 366.316 | 78.953 | 4.640 | 0.000 | 0.014 |
| Maximum foal number per birth | 62-56 | 347.357 | 91.977 | 3.777 | 0.000 | 0.637 |
| Maximum foal number per birth | 74-20 | 684.000 | 162.233 | 4.216 | 0.000 | 0.100 |
| Maximum foal number per birth | 84-20 | 684.000 | 162.233 | 4.216 | 0.000 | 0.100 |
| Maximum foal number per birth | 62-28 | 433.125 | 105.373 | 4.110 | 0.000 | 0.158 |
| Maximum foal number per birth | 62-51 | 349.500 | 83.613 | 4.180 | 0.000 | 0.117 |
| Maximum foal number per birth | 30-25 | 386.250 | 92.931 | 4.156 | 0.000 | 0.130 |
| Maximum foal number per birth | 30-21 | 385.556 | 84.158 | 4.581 | 0.000 | 0.019 |
| Maximum foal number per birth | 30-9 | 684.000 | 101.396 | 6.746 | 0.000 | 0.000 |
| Maximum foal number per birth | 30-5 | 368.083 | 82.789 | 4.446 | 0.000 | 0.035 |
| Maximum foal number per birth | 30-28 | 433.125 | 111.073 | 3.899 | 0.000 | 0.386 |
| Maximum foal number per birth | 62-44 | 433.125 | 105.373 | 4.110 | 0.000 | 0.158 |
| Maximum foal number per birth | 62-43 | 572.500 | 114.716 | 4.991 | 0.000 | 0.002 |
| Maximum foal number per birth | 62-42 | 349.500 | 91.977 | 3.800 | 0.000 | 0.580 |
| Maximum foal number per birth | 62-40 | 349.500 | 83.613 | 4.180 | 0.000 | 0.117 |
| Maximum foal number per birth | 62-21 | 385.556 | 76.477 | 5.041 | 0.000 | 0.002 |
| Maximum foal number per birth | 62-25 | 386.250 | 86.037 | 4.489 | 0.000 | 0.029 |
| Maximum foal number per birth | 62-39 | 429.375 | 105.373 | 4.075 | 0.000 | 0.184 |
| Maximum foal number per birth | 62-38 | 684.000 | 172.074 | 3.975 | 0.000 | 0.282 |
| Maximum foal number per birth | 62-9 | 684.000 | 95.117 | 7.191 | 0.000 | 0.000 |
| Maximum foal number per birth | 62-5 | 368.083 | 74.969 | 4.910 | 0.000 | 0.004 |
| Maximum foal number per birth | 74-9 | 684.000 | 169.667 | 4.031 | 0.000 | 0.222 |
| Maximum foal number per birth | 62-33 | 368.800 | 81.116 | 4.547 | 0.000 | 0.022 |
| Maximum foal number per birth | 84-9 | 684.000 | 169.667 | 4.031 | 0.000 | 0.222 |
| Maximum foal number per birth | 62-32 | 516.750 | 131.424 | 3.932 | 0.000 | 0.337 |
| Maximum foal number per birth | 30-10 | 353.734 | 80.504 | 4.394 | 0.000 | 0.045 |
| Maximum foal number per birth | 30-22 | 397.286 | 98.456 | 4.035 | 0.000 | 0.219 |
| Maximum foal number per birth | 30-14 | 397.286 | 98.456 | 4.035 | 0.000 | 0.219 |
| Maximum foal number per birth | 30-6 | 397.286 | 98.456 | 4.035 | 0.000 | 0.219 |
| Maximum foal number per birth | 30-75 | -461.000 | 119.973 | -3.843 | 0.000 | 0.488 |
| Maximum foal number per birth | 30-77 | -684.000 | 175.622 | -3.895 | 0.000 | 0.394 |
| Maximum foal number per birth | 30-67 | -349.500 | 94.394 | -3.703 | 0.000 | 0.855 |
| Maximum foal number per birth | 30-66 | -416.400 | 105.373 | -3.952 | 0.000 | 0.311 |
| Maximum foal number per birth | 30-58 | -416.400 | 105.373 | -3.952 | 0.000 | 0.311 |
| Maximum foal number per birth | 30-73 | -461.000 | 119.973 | -3.843 | 0.000 | 0.488 |
| Maximum foal number per birth | 30-64 | -684.000 | 136.036 | -5.028 | 0.000 | 0.002 |
| Maximum foal number per birth | 62-22 | 397.286 | 91.977 | 4.319 | 0.000 | 0.063 |
| Maximum foal number per birth | 62-14 | 397.286 | 91.977 | 4.319 | 0.000 | 0.063 |
| Maximum foal number per birth | 62-10 | 353.734 | 72.438 | 4.883 | 0.000 | 0.004 |
| Maximum foal number per birth | 30-51 | -349.500 | 90.691 | -3.854 | 0.000 | 0.466 |
| Maximum foal number per birth | 62-6 | 397.286 | 91.977 | 4.319 | 0.000 | 0.063 |
| Maximum foal number per birth | 30-40 | -349.500 | 90.691 | -3.854 | 0.000 | 0.466 |
| Maximum foal number per birth | 30-39 | -429.375 | 111.073 | -3.866 | 0.000 | 0.444 |
| Maximum foal number per birth | 30-44 | -433.125 | 111.073 | -3.899 | 0.000 | 0.386 |
| Maximum foal number per birth | 30-43 | -572.500 | 119.973 | -4.772 | 0.000 | 0.007 |
| Maximum foal number per birth | 30-38 | -684.000 | 175.622 | -3.895 | 0.000 | 0.394 |
| Maximum foal number per birth | 4-5 | -254.083 | 69.266 | -3.668 | 0.000 | 0.978 |
| Maximum foal number per birth | 4-27 | -258.974 | 67.419 | -3.841 | 0.000 | 0.490 |
| Maximum foal number per birth | 4-21 | -271.556 | 70.896 | -3.830 | 0.000 | 0.513 |
| Maximum foal number per birth | 4-43 | -458.500 | 111.073 | -4.128 | 0.000 | 0.147 |
| Maximum foal number per birth | 4-20 | -570.000 | 75.877 | -7.512 | 0.000 | 0.000 |
| Maximum foal number per birth | 4-64 | -570.000 | 128.256 | -4.444 | 0.000 | 0.035 |
| Maximum foal number per birth | 4-9 | -570.000 | 90.691 | -6.285 | 0.000 | 0.000 |
| Maximum foal number per birth | 45-9 | 567.500 | 111.073 | 5.109 | 0.000 | 0.001 |
| Maximum foal number per birth | 87-9 | 567.500 | 111.073 | 5.109 | 0.000 | 0.001 |
| Maximum foal number per birth | 45-20 | 567.500 | 99.347 | 5.712 | 0.000 | 0.000 |
| Maximum foal number per birth | 45-64 | -567.500 | 143.395 | -3.958 | 0.000 | 0.303 |
| Maximum foal number per birth | 87-64 | 567.500 | 143.395 | 3.958 | 0.000 | 0.303 |
| Maximum foal number per birth | 87-20 | 567.500 | 99.347 | 5.712 | 0.000 | 0.000 |
| Maximum foal number per birth | 48-43 | 432.700 | 114.716 | 3.772 | 0.000 | 0.649 |
| Maximum foal number per birth | 48-64 | -544.200 | 131.424 | -4.141 | 0.000 | 0.139 |
| Maximum foal number per birth | 48-20 | 544.200 | 81.116 | 6.709 | 0.000 | 0.000 |
| Maximum foal number per birth | 48-9 | 544.200 | 95.117 | 5.721 | 0.000 | 0.000 |
| Maximum foal number per birth | 89-20 | 509.250 | 118.247 | 4.307 | 0.000 | 0.066 |
| Maximum foal number per birth | 90-20 | 509.250 | 118.247 | 4.307 | 0.000 | 0.066 |
| Maximum foal number per birth | 26-64 | -509.250 | 128.256 | -3.971 | 0.000 | 0.287 |
| Maximum foal number per birth | 89-9 | 509.250 | 128.256 | 3.971 | 0.000 | 0.287 |
| Maximum foal number per birth | 90-9 | 509.250 | 128.256 | 3.971 | 0.000 | 0.287 |
| Maximum foal number per birth | 26-20 | 509.250 | 75.877 | 6.711 | 0.000 | 0.000 |
| Maximum foal number per birth | 26-9 | 509.250 | 90.691 | 5.615 | 0.000 | 0.000 |
| Maximum foal number per birth | 11-1 | 153.722 | 38.689 | 3.973 | 0.000 | 0.284 |
| Maximum foal number per birth | 11-7 | 154.191 | 41.385 | 3.726 | 0.000 | 0.780 |
| Maximum foal number per birth | 11-10 | 158.425 | 32.219 | 4.917 | 0.000 | 0.004 |
| Maximum foal number per birth | 11-3 | 171.007 | 44.993 | 3.801 | 0.000 | 0.578 |
| Maximum foal number per birth | 11-5 | 172.775 | 37.565 | 4.599 | 0.000 | 0.017 |
| Maximum foal number per birth | 11-27 | -177.665 | 34.038 | -5.220 | 0.000 | 0.001 |
| Maximum foal number per birth | 11-21 | -190.247 | 40.492 | -4.698 | 0.000 | 0.011 |
| Maximum foal number per birth | 11-43 | -377.191 | 94.607 | -3.987 | 0.000 | 0.268 |
| Maximum foal number per birth | 11-64 | -488.691 | 114.293 | -4.276 | 0.000 | 0.076 |
| Maximum foal number per birth | 11-20 | -488.691 | 48.690 | -10.037 | 0.000 | 0.000 |
| Maximum foal number per birth | 11-9 | 488.691 | 69.557 | 7.026 | 0.000 | 0.000 |
| Maximum foal number per birth | 34-20 | 484.286 | 71.902 | 6.735 | 0.000 | 0.000 |
| Maximum foal number per birth | 34-9 | 484.286 | 87.392 | 5.542 | 0.000 | 0.000 |
| Maximum foal number per birth | 34-64 | -484.286 | 125.945 | -3.845 | 0.000 | 0.482 |
| Maximum foal number per birth | 52-9 | 451.000 | 90.691 | 4.973 | 0.000 | 0.003 |
| Maximum foal number per birth | 53-9 | 451.000 | 111.073 | 4.060 | 0.000 | 0.196 |
| Maximum foal number per birth | 29-20 | 451.000 | 75.877 | 5.944 | 0.000 | 0.000 |
| Maximum foal number per birth | 52-20 | 451.000 | 75.877 | 5.944 | 0.000 | 0.000 |
| Maximum foal number per birth | 53-20 | 451.000 | 99.347 | 4.540 | 0.000 | 0.023 |
| Maximum foal number per birth | 29-9 | 451.000 | 90.691 | 4.973 | 0.000 | 0.003 |
| Maximum foal number per birth | 16-27 | -125.766 | 32.167 | -3.910 | 0.000 | 0.370 |
| Maximum foal number per birth | 16-20 | -436.793 | 47.400 | -9.215 | 0.000 | 0.000 |
| Maximum foal number per birth | 16-64 | -436.793 | 113.750 | -3.840 | 0.000 | 0.493 |
| Maximum foal number per birth | 16-9 | 436.793 | 68.660 | 6.362 | 0.000 | 0.000 |
| Maximum foal number per birth | 17-20 | -421.875 | 60.837 | -6.934 | 0.000 | 0.000 |
| Maximum foal number per birth | 17-9 | 421.875 | 78.541 | 5.371 | 0.000 | 0.000 |
| Maximum foal number per birth | 35-9 | 407.400 | 95.117 | 4.283 | 0.000 | 0.074 |
| Maximum foal number per birth | 35-20 | 407.400 | 81.116 | 5.022 | 0.000 | 0.002 |
| Maximum foal number per birth | 76-20 | 404.400 | 81.116 | 4.985 | 0.000 | 0.002 |
| Maximum foal number per birth | 76-9 | 404.400 | 95.117 | 4.252 | 0.000 | 0.085 |
| Maximum foal number per birth | 23-9 | 398.045 | 67.536 | 5.894 | 0.000 | 0.000 |
| Maximum foal number per birth | 23-20 | 398.045 | 45.756 | 8.699 | 0.000 | 0.000 |
| Maximum foal number per birth | 80-9 | 384.429 | 87.392 | 4.399 | 0.000 | 0.044 |
| Maximum foal number per birth | 80-20 | 384.429 | 71.902 | 5.347 | 0.000 | 0.000 |
| Maximum foal number per birth | 19-20 | -367.636 | 62.355 | -5.896 | 0.000 | 0.000 |
| Maximum foal number per birth | 19-9 | 367.636 | 79.722 | 4.611 | 0.000 | 0.016 |
| Maximum foal number per birth | 15-9 | 351.975 | 73.117 | 4.814 | 0.000 | 0.006 |
| Maximum foal number per birth | 15-20 | -351.975 | 53.653 | -6.560 | 0.000 | 0.000 |
| Maximum foal number per birth | 12-20 | -338.250 | 88.395 | -3.827 | 0.000 | 0.520 |
| Maximum foal number per birth | 56-9 | 336.643 | 87.392 | 3.852 | 0.000 | 0.469 |
| Maximum foal number per birth | 56-20 | 336.643 | 71.902 | 4.682 | 0.000 | 0.011 |
| Maximum foal number per birth | 1-9 | -334.969 | 69.882 | -4.793 | 0.000 | 0.007 |
| Maximum foal number per birth | 1-20 | -334.969 | 49.153 | -6.815 | 0.000 | 0.000 |
| Maximum foal number per birth | 51-20 | 334.500 | 60.837 | 5.498 | 0.000 | 0.000 |
| Maximum foal number per birth | 67-20 | 334.500 | 66.231 | 5.050 | 0.000 | 0.002 |
| Maximum foal number per birth | 83-20 | 334.500 | 88.395 | 3.784 | 0.000 | 0.618 |
| Maximum foal number per birth | 7-9 | -334.500 | 71.410 | -4.684 | 0.000 | 0.011 |
| Maximum foal number per birth | 7-20 | -334.500 | 51.303 | -6.520 | 0.000 | 0.000 |
| Maximum foal number per birth | 40-9 | 334.500 | 78.541 | 4.259 | 0.000 | 0.082 |
| Maximum foal number per birth | 42-9 | 334.500 | 87.392 | 3.828 | 0.000 | 0.518 |
| Maximum foal number per birth | 51-9 | 334.500 | 78.541 | 4.259 | 0.000 | 0.082 |
| Maximum foal number per birth | 67-9 | 334.500 | 82.789 | 4.040 | 0.000 | 0.214 |
| Maximum foal number per birth | 13-20 | -334.500 | 88.395 | -3.784 | 0.000 | 0.618 |
| Maximum foal number per birth | 31-20 | 334.500 | 88.395 | 3.784 | 0.000 | 0.618 |
| Maximum foal number per birth | 36-20 | 334.500 | 88.395 | 3.784 | 0.000 | 0.618 |
| Maximum foal number per birth | 40-20 | 334.500 | 60.837 | 5.498 | 0.000 | 0.000 |
| Maximum foal number per birth | 42-20 | 334.500 | 71.902 | 4.652 | 0.000 | 0.013 |
| Maximum foal number per birth | 47-20 | 334.500 | 88.395 | 3.784 | 0.000 | 0.618 |
| Maximum foal number per birth | 10-9 | 330.266 | 66.519 | 4.965 | 0.000 | 0.003 |
| Maximum foal number per birth | 10-20 | -330.266 | 44.241 | -7.465 | 0.000 | 0.000 |
| Maximum foal number per birth | 3-20 | -317.684 | 54.255 | -5.855 | 0.000 | 0.000 |
| Maximum foal number per birth | 3-9 | -317.684 | 73.560 | -4.319 | 0.000 | 0.063 |
| Maximum foal number per birth | 5-9 | -315.917 | 69.266 | -4.561 | 0.000 | 0.020 |
| Maximum foal number per birth | 5-20 | -315.917 | 48.274 | -6.544 | 0.000 | 0.000 |
| Maximum foal number per birth | 33-20 | 315.200 | 57.358 | 5.495 | 0.000 | 0.000 |
| Maximum foal number per birth | 33-9 | 315.200 | 75.877 | 4.154 | 0.000 | 0.131 |
| Maximum foal number per birth | 27-20 | 311.026 | 45.584 | 6.823 | 0.000 | 0.000 |
| Maximum foal number per birth | 27-9 | 311.026 | 67.419 | 4.613 | 0.000 | 0.016 |
| Maximum foal number per birth | 8-9 | -304.091 | 79.722 | -3.814 | 0.000 | 0.547 |
| Maximum foal number per birth | 8-20 | -304.091 | 62.355 | -4.877 | 0.000 | 0.004 |
| Maximum foal number per birth | 21-9 | 298.444 | 70.896 | 4.210 | 0.000 | 0.102 |
| Maximum foal number per birth | 21-20 | 298.444 | 50.585 | 5.900 | 0.000 | 0.000 |
| Maximum foal number per birth | 25-20 | 297.750 | 64.128 | 4.643 | 0.000 | 0.014 |
| Maximum foal number per birth | 25-9 | 297.750 | 81.116 | 3.671 | 0.000 | 0.969 |
| Maximum foal number per birth | 14-20 | -286.714 | 71.902 | -3.988 | 0.000 | 0.267 |
| Maximum foal number per birth | 6-20 | -286.714 | 71.902 | -3.988 | 0.000 | 0.267 |
| Maximum foal number per birth | 22-20 | 286.714 | 71.902 | 3.988 | 0.000 | 0.267 |
| Maximum foal number per birth | 26-20 | 381.267 | 92.125 | 4.139 | 0.000 | 0.140 |
| Maximum foal number per birth | 42-20 | 381.267 | 87.298 | 4.367 | 0.000 | 0.050 |
| Maximum foal number per birth | 48-20 | 381.267 | 98.486 | 3.871 | 0.000 | 0.434 |
| Maximum foal number per birth | 62-20 | 381.267 | 98.486 | 3.871 | 0.000 | 0.434 |
| Maximum foal number per birth | 11-20 | -331.796 | 59.115 | -5.613 | 0.000 | 0.000 |
| Maximum foal number per birth | 80-20 | 324.410 | 87.298 | 3.716 | 0.000 | 0.810 |
| Maximum foal number per birth | 23-10 | 131.821 | 33.492 | 3.936 | 0.000 | 0.332 |
| Maximum foal number per birth | 23-21 | 168.433 | 44.816 | 3.758 | 0.000 | 0.685 |
| Maximum foal number per birth | 23-20 | 322.885 | 55.553 | 5.812 | 0.000 | 0.000 |
| Maximum foal number per birth | 7-20 | -312.127 | 62.288 | -5.011 | 0.000 | 0.002 |
| Maximum foal number per birth | 19-20 | -297.494 | 75.706 | -3.930 | 0.000 | 0.341 |
| Maximum foal number per birth | 27-20 | 275.907 | 55.344 | 4.985 | 0.000 | 0.002 |
| Maximum foal number per birth | 1-20 | -268.876 | 59.678 | -4.505 | 0.000 | 0.027 |
| Maximum foal number per birth | 5-20 | -254.225 | 58.611 | -4.338 | 0.000 | 0.058 |
| Maximum foal number per birth | 7-20 | -378.500 | 35.113 | -10.779 | 0.000 | 0.000 |
| Maximum foal number per birth | 11-20 | -378.500 | 33.325 | -11.358 | 0.000 | 0.000 |
| Maximum foal number per birth | 15-20 | -378.500 | 36.722 | -10.307 | 0.000 | 0.000 |
| Maximum foal number per birth | 16-20 | -378.500 | 32.442 | -11.667 | 0.000 | 0.000 |
| Maximum foal number per birth | 17-20 | -378.500 | 41.639 | -9.090 | 0.000 | 0.000 |
| Maximum foal number per birth | 23-20 | 378.500 | 31.317 | 12.086 | 0.000 | 0.000 |
| Maximum foal number per birth | 40-20 | 378.500 | 41.639 | 9.090 | 0.000 | 0.000 |
| Maximum foal number per birth | 51-20 | 378.500 | 41.639 | 9.090 | 0.000 | 0.000 |
| Maximum foal number per birth | 67-20 | 378.500 | 45.331 | 8.350 | 0.000 | 0.000 |
| Maximum foal number per birth | 10-20 | -373.709 | 30.280 | -12.342 | 0.000 | 0.000 |
| Maximum foal number per birth | 1-20 | -366.672 | 33.642 | -10.899 | 0.000 | 0.000 |
| Maximum foal number per birth | 5-20 | -357.472 | 33.040 | -10.819 | 0.000 | 0.000 |
| Maximum foal number per birth | 27-20 | 351.939 | 31.199 | 11.281 | 0.000 | 0.000 |
| Maximum foal number per birth | 3-20 | -338.658 | 37.134 | -9.120 | 0.000 | 0.000 |
| Maximum foal number per birth | 21-20 | 307.204 | 34.622 | 8.873 | 0.000 | 0.000 |
| Maximum foal number per birth | 23-9 | 378.500 | 46.223 | 8.189 | 0.000 | 0.000 |
| Maximum foal number per birth | 10-9 | 373.709 | 45.527 | 8.208 | 0.000 | 0.000 |
| Maximum foal number per birth | 16-9 | 378.500 | 46.993 | 8.054 | 0.000 | 0.000 |
| Maximum foal number per birth | 8-20 | -344.091 | 42.677 | -8.063 | 0.000 | 0.000 |
| Maximum foal number per birth | 19-20 | -340.773 | 42.677 | -7.985 | 0.000 | 0.000 |
| Maximum foal number per birth | 11-9 | 378.500 | 47.607 | 7.951 | 0.000 | 0.000 |
| Maximum foal number per birth | 7-9 | -378.500 | 48.875 | -7.744 | 0.000 | 0.000 |
| Maximum foal number per birth | 34-20 | 378.500 | 49.212 | 7.691 | 0.000 | 0.000 |
| Maximum foal number per birth | 42-20 | 378.500 | 49.212 | 7.691 | 0.000 | 0.000 |
| Maximum foal number per birth | 80-20 | 378.500 | 49.212 | 7.691 | 0.000 | 0.000 |
| Maximum foal number per birth | 25-20 | 337.400 | 43.891 | 7.687 | 0.000 | 0.000 |
| Maximum foal number per birth | 1-9 | -366.672 | 47.829 | -7.666 | 0.000 | 0.000 |
| Maximum foal number per birth | 27-9 | 351.939 | 46.143 | 7.627 | 0.000 | 0.000 |
| Maximum foal number per birth | 15-9 | 378.500 | 50.044 | 7.563 | 0.000 | 0.000 |
| Maximum foal number per birth | 5-9 | -357.472 | 47.408 | -7.540 | 0.000 | 0.000 |
| Maximum foal number per birth | 26-20 | 378.500 | 51.933 | 7.288 | 0.000 | 0.000 |
| Maximum foal number per birth | 29-20 | 378.500 | 51.933 | 7.288 | 0.000 | 0.000 |
| Maximum foal number per birth | 52-20 | 378.500 | 51.933 | 7.288 | 0.000 | 0.000 |
| Maximum foal number per birth | 33-20 | 277.567 | 39.258 | 7.070 | 0.000 | 0.000 |
| Maximum foal number per birth | 17-9 | 378.500 | 53.756 | 7.041 | 0.000 | 0.000 |
| Maximum foal number per birth | 40-9 | 378.500 | 53.756 | 7.041 | 0.000 | 0.000 |
| Maximum foal number per birth | 51-9 | 378.500 | 53.756 | 7.041 | 0.000 | 0.000 |
| Maximum foal number per birth | 48-20 | 378.500 | 55.518 | 6.818 | 0.000 | 0.000 |
| Maximum foal number per birth | 62-20 | 378.500 | 55.518 | 6.818 | 0.000 | 0.000 |
| Maximum foal number per birth | 76-20 | 378.500 | 55.518 | 6.818 | 0.000 | 0.000 |
| Maximum foal number per birth | 3-9 | -338.658 | 50.347 | -6.727 | 0.000 | 0.000 |
| Maximum foal number per birth | 67-9 | 378.500 | 56.663 | 6.680 | 0.000 | 0.000 |
| Maximum foal number per birth | 22-20 | 324.429 | 49.212 | 6.592 | 0.000 | 0.000 |
| Maximum foal number per birth | 56-20 | 324.429 | 49.212 | 6.592 | 0.000 | 0.000 |
| Maximum foal number per birth | 14-20 | -319.786 | 49.212 | -6.498 | 0.000 | 0.000 |
| Maximum foal number per birth | 6-20 | -319.786 | 49.212 | -6.498 | 0.000 | 0.000 |
| Maximum foal number per birth | 21-9 | 307.204 | 48.524 | 6.331 | 0.000 | 0.000 |
| Maximum foal number per birth | 34-9 | 378.500 | 59.814 | 6.328 | 0.000 | 0.000 |
| Maximum foal number per birth | 42-9 | 378.500 | 59.814 | 6.328 | 0.000 | 0.000 |
| Maximum foal number per birth | 80-9 | 378.500 | 59.814 | 6.328 | 0.000 | 0.000 |
| Maximum foal number per birth | 8-9 | -344.091 | 54.564 | -6.306 | 0.000 | 0.000 |
| Maximum foal number per birth | 13-20 | -378.500 | 60.500 | -6.256 | 0.000 | 0.000 |
| Maximum foal number per birth | 30-20 | 378.500 | 60.500 | 6.256 | 0.000 | 0.000 |
| Maximum foal number per birth | 31-20 | 378.500 | 60.500 | 6.256 | 0.000 | 0.000 |
| Maximum foal number per birth | 36-20 | 378.500 | 60.500 | 6.256 | 0.000 | 0.000 |
| Maximum foal number per birth | 47-20 | 378.500 | 60.500 | 6.256 | 0.000 | 0.000 |
| Maximum foal number per birth | 83-20 | 378.500 | 60.500 | 6.256 | 0.000 | 0.000 |
| Maximum foal number per birth | 19-9 | 340.773 | 54.564 | 6.245 | 0.000 | 0.000 |
| Maximum foal number per birth | 26-9 | 378.500 | 62.072 | 6.098 | 0.000 | 0.000 |
| Maximum foal number per birth | 29-9 | 378.500 | 62.072 | 6.098 | 0.000 | 0.000 |
| Maximum foal number per birth | 52-9 | 378.500 | 62.072 | 6.098 | 0.000 | 0.000 |
| Maximum foal number per birth | 25-9 | 337.400 | 55.518 | 6.077 | 0.000 | 0.000 |
| Maximum foal number per birth | 4-20 | -315.417 | 51.933 | -6.074 | 0.000 | 0.000 |
| Maximum foal number per birth | 48-9 | 378.500 | 65.101 | 5.814 | 0.000 | 0.000 |
| Maximum foal number per birth | 62-9 | 378.500 | 65.101 | 5.814 | 0.000 | 0.000 |
| Maximum foal number per birth | 76-9 | 378.500 | 65.101 | 5.814 | 0.000 | 0.000 |
| Maximum foal number per birth | 18-20 | -378.500 | 67.996 | -5.567 | 0.000 | 0.000 |
| Maximum foal number per birth | 24-20 | 378.500 | 67.996 | 5.567 | 0.000 | 0.000 |
| Maximum foal number per birth | 45-20 | 378.500 | 67.996 | 5.567 | 0.000 | 0.000 |
| Maximum foal number per birth | 46-20 | 378.500 | 67.996 | 5.567 | 0.000 | 0.000 |
| Maximum foal number per birth | 49-20 | 378.500 | 67.996 | 5.567 | 0.000 | 0.000 |
| Maximum foal number per birth | 50-20 | 378.500 | 67.996 | 5.567 | 0.000 | 0.000 |
| Maximum foal number per birth | 53-20 | 378.500 | 67.996 | 5.567 | 0.000 | 0.000 |
| Maximum foal number per birth | 59-20 | 378.500 | 67.996 | 5.567 | 0.000 | 0.000 |
| Maximum foal number per birth | 61-20 | 378.500 | 67.996 | 5.567 | 0.000 | 0.000 |
| Maximum foal number per birth | 63-20 | 378.500 | 67.996 | 5.567 | 0.000 | 0.000 |
| Maximum foal number per birth | 69-20 | 378.500 | 67.996 | 5.567 | 0.000 | 0.000 |
| Maximum foal number per birth | 87-20 | 378.500 | 67.996 | 5.567 | 0.000 | 0.000 |
| Maximum foal number per birth | 13-9 | 378.500 | 69.398 | 5.454 | 0.000 | 0.000 |
| Maximum foal number per birth | 30-9 | 378.500 | 69.398 | 5.454 | 0.000 | 0.000 |
| Maximum foal number per birth | 31-9 | 378.500 | 69.398 | 5.454 | 0.000 | 0.000 |
| Maximum foal number per birth | 36-9 | 378.500 | 69.398 | 5.454 | 0.000 | 0.000 |
| Maximum foal number per birth | 47-9 | 378.500 | 69.398 | 5.454 | 0.000 | 0.000 |
| Maximum foal number per birth | 83-9 | 378.500 | 69.398 | 5.454 | 0.000 | 0.000 |
| Maximum foal number per birth | 58-20 | 302.800 | 55.518 | 5.454 | 0.000 | 0.000 |
| Maximum foal number per birth | 66-20 | 302.800 | 55.518 | 5.454 | 0.000 | 0.000 |
| Maximum foal number per birth | 35-20 | 302.800 | 55.518 | 5.454 | 0.000 | 0.000 |
| Maximum foal number per birth | 56-9 | 324.429 | 59.814 | 5.424 | 0.000 | 0.000 |
| Maximum foal number per birth | 22-9 | 324.429 | 59.814 | 5.424 | 0.000 | 0.000 |
| Maximum foal number per birth | 6-9 | -319.786 | 59.814 | -5.346 | 0.000 | 0.000 |
| Maximum foal number per birth | 14-9 | 319.786 | 59.814 | 5.346 | 0.000 | 0.000 |
| Maximum foal number per birth | 33-9 | 277.567 | 51.933 | 5.345 | 0.000 | 0.000 |
| Maximum foal number per birth | 23-64 | -394.750 | 77.392 | -5.101 | 0.000 | 0.001 |
| Maximum foal number per birth | 4-9 | -315.417 | 62.072 | -5.082 | 0.000 | 0.001 |
| Maximum foal number per birth | 16-64 | -394.750 | 77.854 | -5.070 | 0.000 | 0.002 |
| Maximum foal number per birth | 10-64 | -389.959 | 76.978 | -5.066 | 0.000 | 0.002 |
| Maximum foal number per birth | 11-64 | -394.750 | 78.226 | -5.046 | 0.000 | 0.002 |
| Maximum foal number per birth | 7-64 | -394.750 | 79.004 | -4.997 | 0.000 | 0.002 |
| Maximum foal number per birth | 18-9 | 378.500 | 76.022 | 4.979 | 0.000 | 0.003 |
| Maximum foal number per birth | 24-9 | 378.500 | 76.022 | 4.979 | 0.000 | 0.003 |
| Maximum foal number per birth | 45-9 | 378.500 | 76.022 | 4.979 | 0.000 | 0.003 |
| Maximum foal number per birth | 46-9 | 378.500 | 76.022 | 4.979 | 0.000 | 0.003 |
| Maximum foal number per birth | 49-9 | 378.500 | 76.022 | 4.979 | 0.000 | 0.003 |
| Maximum foal number per birth | 50-9 | 378.500 | 76.022 | 4.979 | 0.000 | 0.003 |
| Maximum foal number per birth | 53-9 | 378.500 | 76.022 | 4.979 | 0.000 | 0.003 |
| Maximum foal number per birth | 59-9 | 378.500 | 76.022 | 4.979 | 0.000 | 0.003 |
| Maximum foal number per birth | 61-9 | 378.500 | 76.022 | 4.979 | 0.000 | 0.003 |
| Maximum foal number per birth | 63-9 | 378.500 | 76.022 | 4.979 | 0.000 | 0.003 |
| Maximum foal number per birth | 69-9 | 378.500 | 76.022 | 4.979 | 0.000 | 0.003 |
| Maximum foal number per birth | 87-9 | 378.500 | 76.022 | 4.979 | 0.000 | 0.003 |
| Maximum foal number per birth | 15-64 | -394.750 | 79.732 | -4.951 | 0.000 | 0.003 |
| Maximum foal number per birth | 1-64 | -382.922 | 78.362 | -4.887 | 0.000 | 0.004 |
| Maximum foal number per birth | 17-64 | -394.750 | 82.113 | -4.807 | 0.000 | 0.006 |
| Maximum foal number per birth | 40-64 | -394.750 | 82.113 | -4.807 | 0.000 | 0.006 |
| Maximum foal number per birth | 51-64 | -394.750 | 82.113 | -4.807 | 0.000 | 0.006 |
| Maximum foal number per birth | 5-64 | -373.722 | 78.105 | -4.785 | 0.000 | 0.007 |
| Maximum foal number per birth | 27-64 | -368.189 | 77.344 | -4.760 | 0.000 | 0.008 |
| Maximum foal number per birth | 67-64 | 394.750 | 84.045 | 4.697 | 0.000 | 0.011 |
| Maximum foal number per birth | 44-20 | 283.875 | 60.500 | 4.692 | 0.000 | 0.011 |
| Maximum foal number per birth | 12-20 | -283.875 | 60.500 | -4.692 | 0.000 | 0.011 |
| Maximum foal number per birth | 28-20 | 283.875 | 60.500 | 4.692 | 0.000 | 0.011 |
| Maximum foal number per birth | 41-20 | 378.500 | 80.931 | 4.677 | 0.000 | 0.012 |
| Maximum foal number per birth | 65-20 | 378.500 | 80.931 | 4.677 | 0.000 | 0.012 |
| Maximum foal number per birth | 79-20 | 378.500 | 80.931 | 4.677 | 0.000 | 0.012 |
| Maximum foal number per birth | 81-20 | 378.500 | 80.931 | 4.677 | 0.000 | 0.012 |
| Maximum foal number per birth | 82-20 | 378.500 | 80.931 | 4.677 | 0.000 | 0.012 |
| Maximum foal number per birth | 85-20 | 378.500 | 80.931 | 4.677 | 0.000 | 0.012 |
| Maximum foal number per birth | 89-20 | 378.500 | 80.931 | 4.677 | 0.000 | 0.012 |
| Maximum foal number per birth | 90-20 | 378.500 | 80.931 | 4.677 | 0.000 | 0.012 |
| Maximum foal number per birth | 58-9 | 302.800 | 65.101 | 4.651 | 0.000 | 0.013 |
| Maximum foal number per birth | 35-9 | 302.800 | 65.101 | 4.651 | 0.000 | 0.013 |
| Maximum foal number per birth | 66-9 | 302.800 | 65.101 | 4.651 | 0.000 | 0.013 |
| Maximum foal number per birth | 80-64 | 394.750 | 86.201 | 4.579 | 0.000 | 0.019 |
| Maximum foal number per birth | 34-64 | -394.750 | 86.201 | -4.579 | 0.000 | 0.019 |
| Maximum foal number per birth | 42-64 | -394.750 | 86.201 | -4.579 | 0.000 | 0.019 |
| Maximum foal number per birth | 26-64 | -394.750 | 87.782 | -4.497 | 0.000 | 0.028 |
| Maximum foal number per birth | 29-64 | -394.750 | 87.782 | -4.497 | 0.000 | 0.028 |
| Maximum foal number per birth | 52-64 | -394.750 | 87.782 | -4.497 | 0.000 | 0.028 |
| Maximum foal number per birth | 3-64 | -354.908 | 79.923 | -4.441 | 0.000 | 0.036 |
| Maximum foal number per birth | 76-64 | 394.750 | 89.950 | 4.389 | 0.000 | 0.046 |
| Maximum foal number per birth | 48-64 | -394.750 | 89.950 | -4.389 | 0.000 | 0.046 |
| Maximum foal number per birth | 62-64 | -394.750 | 89.950 | -4.389 | 0.000 | 0.046 |
| Maximum foal number per birth | 8-64 | -360.341 | 82.644 | -4.360 | 0.000 | 0.052 |
| Maximum foal number per birth | 19-64 | -357.023 | 82.644 | -4.320 | 0.000 | 0.062 |
| Maximum foal number per birth | 41-9 | 378.500 | 87.782 | 4.312 | 0.000 | 0.065 |
| Maximum foal number per birth | 65-9 | 378.500 | 87.782 | 4.312 | 0.000 | 0.065 |
| Maximum foal number per birth | 79-9 | 378.500 | 87.782 | 4.312 | 0.000 | 0.065 |
| Maximum foal number per birth | 81-9 | 378.500 | 87.782 | 4.312 | 0.000 | 0.065 |
| Maximum foal number per birth | 82-9 | 378.500 | 87.782 | 4.312 | 0.000 | 0.065 |
| Maximum foal number per birth | 85-9 | 378.500 | 87.782 | 4.312 | 0.000 | 0.065 |
| Maximum foal number per birth | 89-9 | 378.500 | 87.782 | 4.312 | 0.000 | 0.065 |
| Maximum foal number per birth | 90-9 | 378.500 | 87.782 | 4.312 | 0.000 | 0.065 |
| Maximum foal number per birth | 25-64 | -353.650 | 83.278 | -4.247 | 0.000 | 0.087 |
| Maximum foal number per birth | 83-64 | 394.750 | 93.107 | 4.240 | 0.000 | 0.090 |
| Maximum foal number per birth | 13-64 | -394.750 | 93.107 | -4.240 | 0.000 | 0.090 |
| Maximum foal number per birth | 30-64 | -394.750 | 93.107 | -4.240 | 0.000 | 0.090 |
| Maximum foal number per birth | 31-64 | -394.750 | 93.107 | -4.240 | 0.000 | 0.090 |
| Maximum foal number per birth | 36-64 | -394.750 | 93.107 | -4.240 | 0.000 | 0.090 |
| Maximum foal number per birth | 47-64 | -394.750 | 93.107 | -4.240 | 0.000 | 0.090 |
| Maximum foal number per birth | 23-43 | -263.167 | 63.742 | -4.129 | 0.000 | 0.146 |
| Maximum foal number per birth | 21-64 | -323.454 | 78.787 | -4.105 | 0.000 | 0.162 |
| Maximum foal number per birth | 16-43 | -263.167 | 64.302 | -4.093 | 0.000 | 0.171 |
| Maximum foal number per birth | 44-9 | 283.875 | 69.398 | 4.091 | 0.000 | 0.172 |
| Maximum foal number per birth | 28-9 | 283.875 | 69.398 | 4.091 | 0.000 | 0.172 |
| Maximum foal number per birth | 12-9 | 283.875 | 69.398 | 4.091 | 0.000 | 0.172 |
| Maximum foal number per birth | 10-43 | -258.376 | 63.239 | -4.086 | 0.000 | 0.176 |
| Maximum foal number per birth | 11-43 | -263.167 | 64.752 | -4.064 | 0.000 | 0.193 |
| Maximum foal number per birth | 69-64 | 394.750 | 98.144 | 4.022 | 0.000 | 0.231 |
| Maximum foal number per birth | 87-64 | 394.750 | 98.144 | 4.022 | 0.000 | 0.231 |
| Maximum foal number per birth | 18-64 | -394.750 | 98.144 | -4.022 | 0.000 | 0.231 |
| Maximum foal number per birth | 24-64 | -394.750 | 98.144 | -4.022 | 0.000 | 0.231 |
| Maximum foal number per birth | 45-64 | -394.750 | 98.144 | -4.022 | 0.000 | 0.231 |
| Maximum foal number per birth | 46-64 | -394.750 | 98.144 | -4.022 | 0.000 | 0.231 |
| Maximum foal number per birth | 49-64 | -394.750 | 98.144 | -4.022 | 0.000 | 0.231 |
| Maximum foal number per birth | 50-64 | -394.750 | 98.144 | -4.022 | 0.000 | 0.231 |
| Maximum foal number per birth | 53-64 | -394.750 | 98.144 | -4.022 | 0.000 | 0.231 |
| Maximum foal number per birth | 59-64 | -394.750 | 98.144 | -4.022 | 0.000 | 0.231 |
| Maximum foal number per birth | 61-64 | -394.750 | 98.144 | -4.022 | 0.000 | 0.231 |
| Maximum foal number per birth | 63-64 | -394.750 | 98.144 | -4.022 | 0.000 | 0.231 |
| Maximum foal number per birth | 7-43 | -263.167 | 65.690 | -4.006 | 0.000 | 0.247 |
| Maximum foal number per birth | 15-43 | -263.167 | 66.564 | -3.954 | 0.000 | 0.308 |
| Maximum foal number per birth | 22-64 | -340.679 | 86.201 | -3.952 | 0.000 | 0.310 |
| Maximum foal number per birth | 56-64 | -340.679 | 86.201 | -3.952 | 0.000 | 0.310 |
| Maximum foal number per birth | 6-64 | -336.036 | 86.201 | -3.898 | 0.000 | 0.388 |
| Maximum foal number per birth | 14-64 | -336.036 | 86.201 | -3.898 | 0.000 | 0.388 |
| Maximum foal number per birth | 1-43 | -251.339 | 64.916 | -3.872 | 0.000 | 0.433 |
| Maximum foal number per birth | 17-43 | -263.167 | 69.398 | -3.792 | 0.000 | 0.598 |
| Maximum foal number per birth | 40-43 | -263.167 | 69.398 | -3.792 | 0.000 | 0.598 |
| Maximum foal number per birth | 51-43 | 263.167 | 69.398 | 3.792 | 0.000 | 0.598 |
| Maximum foal number per birth | 23-38 | -411.000 | 108.484 | -3.789 | 0.000 | 0.607 |
| Maximum foal number per birth | 4-64 | -331.667 | 87.782 | -3.778 | 0.000 | 0.632 |
| Maximum foal number per birth | 16-38 | -411.000 | 108.814 | -3.777 | 0.000 | 0.636 |
| Maximum foal number per birth | 11-38 | -411.000 | 109.081 | -3.768 | 0.000 | 0.659 |
| Maximum foal number per birth | 10-38 | -406.209 | 108.189 | -3.755 | 0.000 | 0.695 |
| Maximum foal number per birth | 7-38 | -411.000 | 109.640 | -3.749 | 0.000 | 0.712 |
| Maximum foal number per birth | 5-43 | -242.139 | 64.606 | -3.748 | 0.000 | 0.714 |
| Maximum foal number per birth | 15-38 | -411.000 | 110.166 | -3.731 | 0.000 | 0.765 |
| Maximum foal number per birth | 27-43 | -236.605 | 63.684 | -3.715 | 0.000 | 0.813 |
| Maximum foal number per birth | 55-20 | 252.333 | 67.996 | 3.711 | 0.000 | 0.827 |
| Maximum foal number per birth | 73-20 | 252.333 | 67.996 | 3.711 | 0.000 | 0.827 |
| Maximum foal number per birth | 75-20 | 252.333 | 67.996 | 3.711 | 0.000 | 0.827 |
| Maximum foal number per birth | 17-38 | -411.000 | 111.901 | -3.673 | 0.000 | 0.961 |
| Maximum foal number per birth | 40-38 | 411.000 | 111.901 | 3.673 | 0.000 | 0.961 |
| Maximum foal number per birth | 51-38 | 411.000 | 111.901 | 3.673 | 0.000 | 0.961 |
| Maximum foal number per birth | 65-64 | 394.750 | 107.511 | 3.672 | 0.000 | 0.965 |
| Maximum foal number per birth | 79-64 | 394.750 | 107.511 | 3.672 | 0.000 | 0.965 |
| Maximum foal number per birth | 81-64 | 394.750 | 107.511 | 3.672 | 0.000 | 0.965 |
| Maximum foal number per birth | 82-64 | 394.750 | 107.511 | 3.672 | 0.000 | 0.965 |
| Maximum foal number per birth | 85-64 | 394.750 | 107.511 | 3.672 | 0.000 | 0.965 |
| Maximum foal number per birth | 89-64 | 394.750 | 107.511 | 3.672 | 0.000 | 0.965 |
| Maximum foal number per birth | 90-64 | 394.750 | 107.511 | 3.672 | 0.000 | 0.965 |
| Maximum foal number per birth | 41-64 | -394.750 | 107.511 | -3.672 | 0.000 | 0.965 |
| Maximum foal number per birth | 67-43 | 263.167 | 71.674 | 3.672 | 0.000 | 0.965 |
| Bonferroni's Adjusted Significance was 1 for all the possible combinations of levels (farms/owners) for the variables historical foal number born per donkey and multiple birth number per animal for a given donkey. For maximum foal number per birth the rest of possible combinations between levels (farms/owners) not presented here in this table were 1 as well. | | | | | | |

**HUSBANDRY SYSTEM**

| Variable | Birth month pairwise comparison | Contrast Statistic | SE | Contrast statistic deviation | Sig. | Bonferroni's Adjusted Sig. |
| --- | --- | --- | --- | --- | --- | --- |
| Maximum foal number per birth | Extensive-Intensive | 53.503 | 44.464 | 1.203 | 0.229 | 1.000 |
| Maximum foal number per birth | Extensive-Semiintensive | 54.268 | 20.073 | 2.704 | 0.007 | 0.041 |
| Maximum foal number per birth | Extensive-Semiextensive | 82.964 | 16.230 | 5.112 | 0.000 | 0.000 |
| Maximum foal number per birth | Intensive-Semiintensive | -0.765 | 44.168 | -0.017 | 0.986 | 1.000 |
| Maximum foal number per birth | Intensive-Semiextensive | -29.46 | 42.560 | -0.692 | 0.489 | 1.000 |
| Maximum foal number per birth | Semiintensive-Semiextensive | -28.696 | 15.402 | -1.863 | 0.062 | 0.375 |
